# Supplementary material
Source: PubMed Central journal article supplement (PMC9350246)

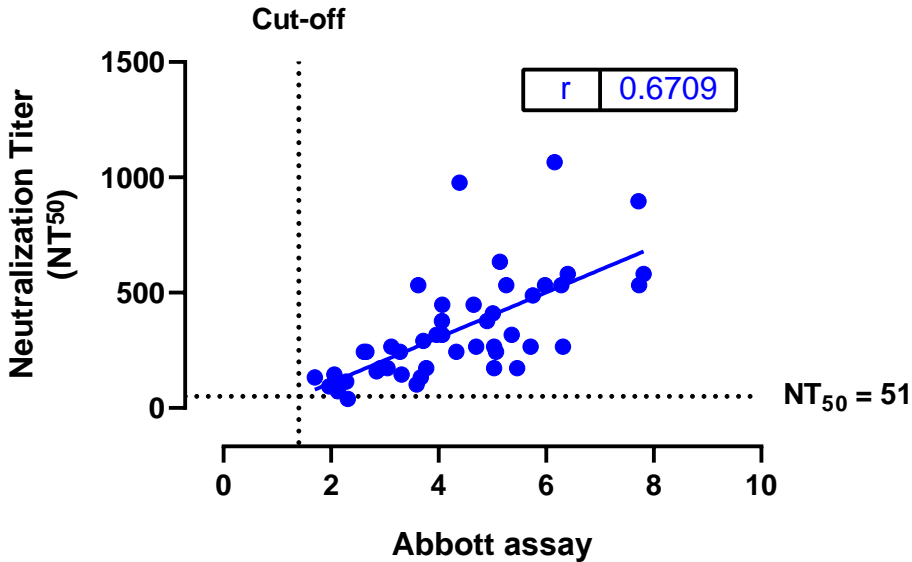

Supplement: JCA-37-449-s001.pdf [file JCA-37-449-s001.pdf]
